# Supplementary material
Source: PubMed Central journal article supplement (PMC4713326)
Supplement: NIHMS739705-supplement-Supplementale_material.pdf [file NIHMS739705-supplement-Supplementale_material.pdf]

**SUPPLEMENTAL MATERIAL**

**LANOSTEROL SYNTHASE GENE POLYMORPHISMS AND CHANGES IN  
ENDOGENOUS OUABAIN IN THE RESPONSE TO LOW SODIUM INTAKE**

Running Title: LSS, EO effect of low Na diet

Chiara Lanzani, Guido Gatti, Lorena Citterio, Elisabetta Messaggio, Simona Delli  
Carpini, Marco Simonini, Nunzia Casamassima, Laura Zagato, Elena Brioni, John M.  
Hamlyn, and Paolo Manunta

Università Vita Salute San Raffaele, Chair of Nephrology; San Raffaele Scientific  
Institute, Genomics of Renal Disease and Hypertension Unit, Milan, Italy

(CL, GG, LC, EM, SDC, MS, NC, LZ, EB, PM)

and

Dept. of Physiology, University of Maryland Baltimore, Baltimore, Maryland, USA

(JMH)

**Corresponding Author:**

Prof. Paolo Manunta

University Vita Salute San Raffaele, Chair of Nephrology

IRCCS San Raffaele Scientific Institute, Genomics of Renal Diseases and  
Hypertension Unit

Via Olgettina 60,

20132 Milan, Italy

Tel +39 02 2643 5330

Fax +39 02 2643 2384

E-mail [manunta.paolo@hsr.it](mailto:manunta.paolo@hsr.it)

**Table S1.** Clinical characteristics of compliant patients genotyped by their LSS rs2224524 alleles

| Parameters          | LSS genotype    |                |                |
|---------------------|-----------------|----------------|----------------|
|                     | AA<br>(n = 22)  | AC<br>(n = 73) | CC<br>(n =100) |
| SBP baseline (mmHg) | 139.9 ± 1.9     | 142.5 ± 1.6    | 143.0 ± 1.2    |
| DBP baseline(mmHg)  | 90.4 ± 1.2      | 90.6 ± 1.0     | 90.0 ± 0.8     |
| ΔSBP (mmHg)         | -9.2 ± 0.9      | -6.58 ± 1.57   | -3.5 ± 1.2     |
| ΔDBP (mmHg)         | -4.98 ± 1.67    | -3.6 ± 1.0     | -1.7 ± 0.7     |
| UNa 2 wks (mEq/day) | 74.5 ± 14.1     | 83.31 ± 4.3    | 82.0 ± 3.6     |
| UK 2 wks (mEq/day)  | 67.1 ± 7.7      | 64.1 ± 2.68    | 63.4 ± 2.4     |
| ΔPRA (ng/ml/hr)     | +0.47 ±<br>0.19 | +0.22 ± 0.21   | +0.80 ± 0.14   |
| ΔAldo (ng/dl)       | +38.1 ±<br>17.7 | +21.9 ± 13.1   | +23.5 ± 9.7    |
| ΔEO (pmol/L)        | +1.42 ± 0.2     | +13.1 ± 7.2    | +13.3 ± 7.8    |
| ΔGFR (ml/ml)        | -3.89 ± 4.79    | -11.7 ± 3.6    | -8.9 ±3.8      |

All data are means ± SEM. No significant differences were found among individual LSS genotypes.

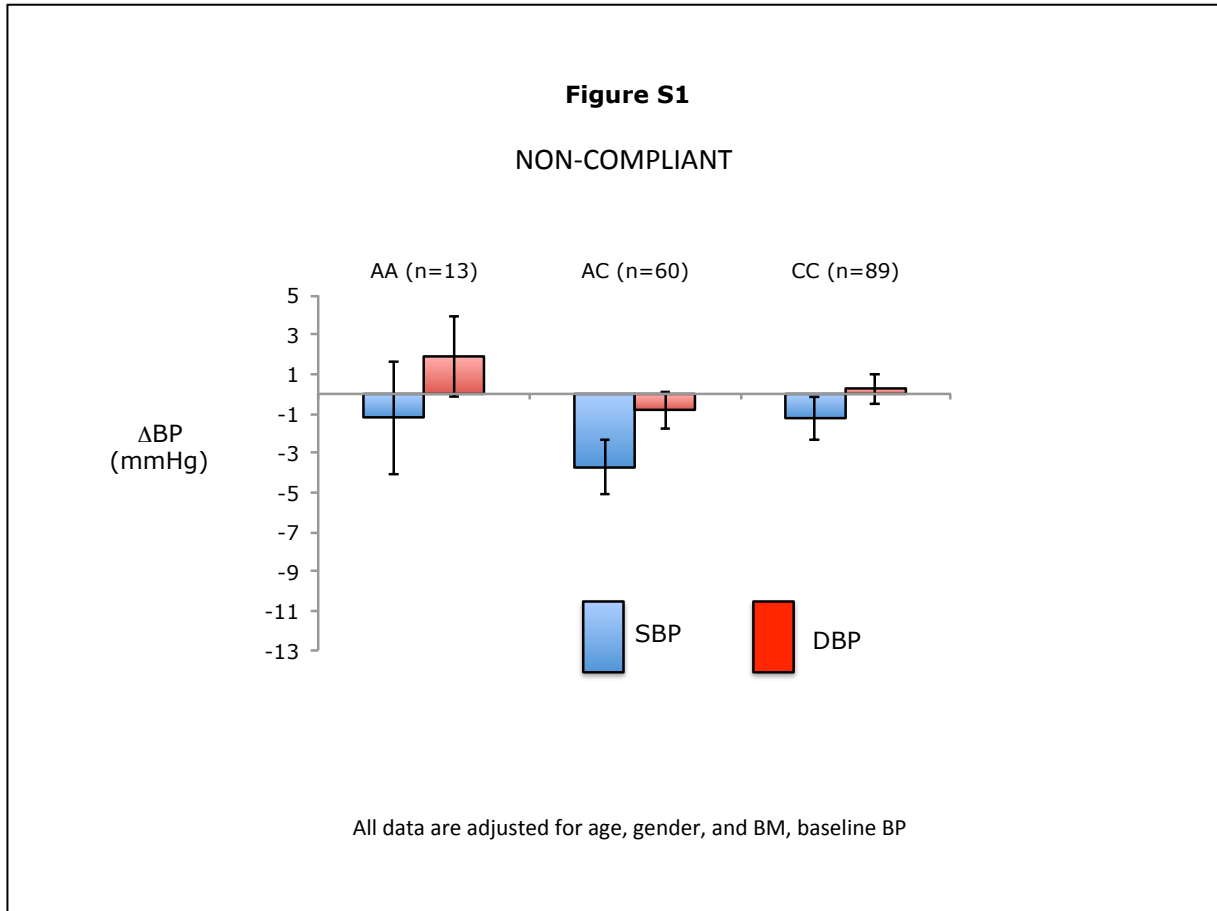

**Figure S1.** Absence of changes in systolic (red bar) and diastolic BP (blue bar) according to LSS rs2254524 genotype in response to the low salt diet in the non-compliant group.

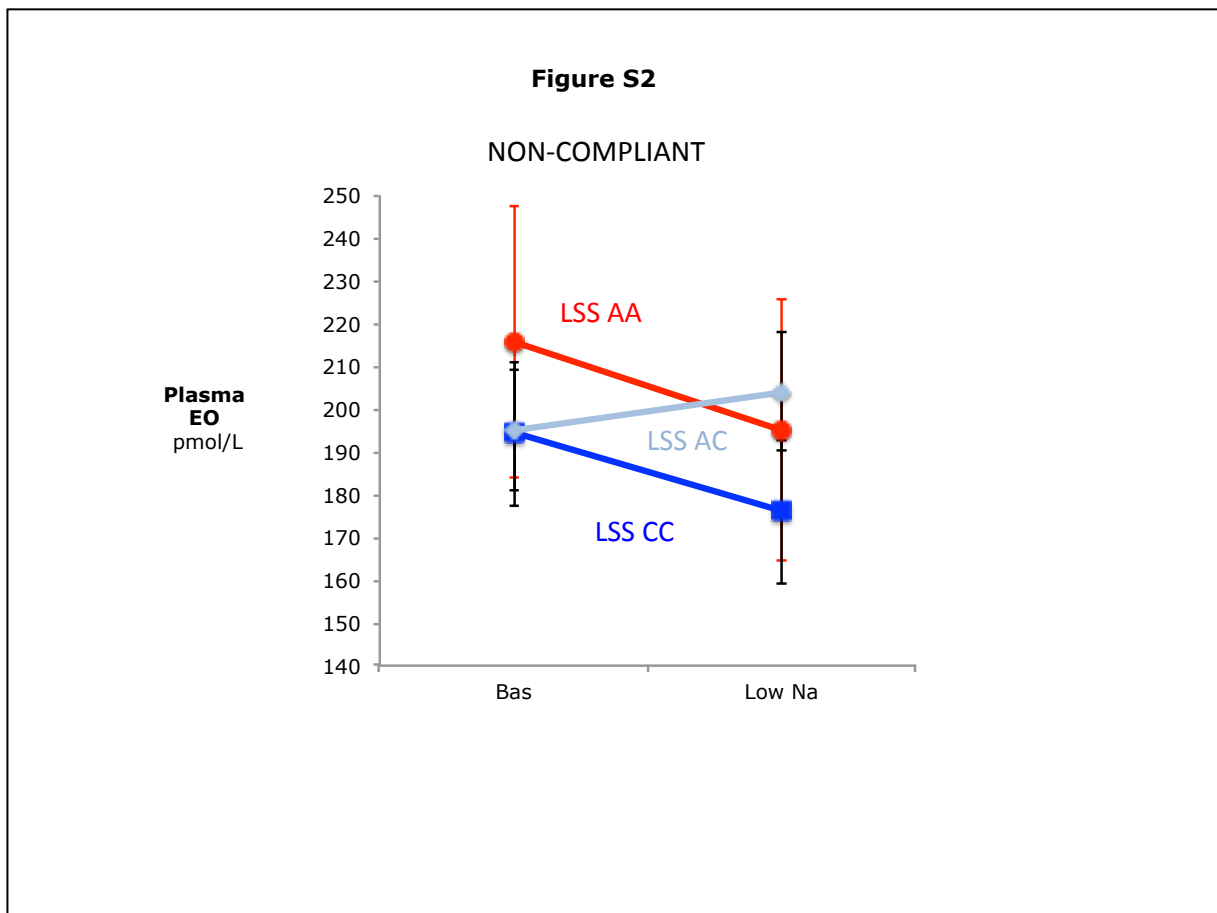

**Figure S2.** In NON Compliant hypertensive patients no significant changes in plasma EO are found according to LSS genotypes.
